# Supplementary material
Source: publisher site journal article supplement (https://www.dovepress.com/get_supplementary_file.php?f=296510.docx)
Supplement: Supplementary file 1 [file get_supplementary_file.php]

**Supplementary Materials**

| **Table S1.** Ocular and DED-related surgical procedures in the pre- and post-index periods | | |
| --- | --- | --- |
|  | **Pre-Index**  **n=600** | **Post-Index**  **n=600** |
| **Ocular surgical procedures, n (% [95% CI])a** | 52 (8.7 [6.5, 11.2]) | - |
| Cataract surgery | 30 (5.0 [3.4, 7.1]) | - |
| Corneal surgery | 4 (0.7 [0.2, 1.7]) | - |
| Eye muscle surgery | 3 (0.5 [0.1, 1.5]) | - |
| Glaucoma surgery | 1 (0.2 [0.0, 0.9]) | - |
| Laser eye surgery (eg, LASIK, PRK) | 13 (2.2 [1.2, 3.7]) | - |
| Oculoplastic surgery | 8 (1.3 [0.6, 2.6]) | - |
| Otherb | 1 (0.2 [0.0, 0.9]) | - |
| **DED-related surgical procedures, n (% [95% CI])a,c** |  |  |
| Amniotic membrane grafts | 4 (0.7 [0.2, 1.7]) | 7 (1.2 [0.5, 2.4]) |
| Conjunctival surgery | 2 (0.3 [0.0, 1.2]) | 3 (0.5 [0.1, 1.5]) |
| Conjunctivochalasis surgical treatment | 0 (0.0) | 0 (0.0) |
| Debridement | 5 (0.8 [0.3, 1.9]) | 3 (0.5 [0.1, 1.5]) |
| Essential blepharospasm treatment with botulinum neurotoxin | 1 (0.2 [0.0, 0.9]) | 1 (0.2 [0.0, 0.9]) |
| Lid corrections (eg, dermatochalasis, blepharoptosis, lower lid blepharoplasty) | 4 (0.7 [0.2, 1.7]) | 3 (0.5 [0.1, 1.5]) |
| Major salivary gland transplantation | 1 (0.2 [0.0, 0.9]) | 1 (0.2 [0.0, 0.9]) |
| Mechanical dacryoreservoirs | 1 (0.2 [0.0, 0.9]) | 0 (0.0) |
| Microvascular submandibular gland transplantation | 0 (0.0) | 0 (0.0) |
| Minor salivary gland autotransplantation | 0 (0.0) | 0 (0.0) |
| Parotid duct transposition | 0 (0.0) | 0 (0.0) |
| Tarsorrhaphy | 1 (0.2 [0.0, 0.9]) | 0 (0.0) |
| **Abbreviations:** CI, confidence interval; DED, dry eye disease; LASIK: laser-assisted in-situ keratomileusis;  PRK, photoreactive keratectomy; SD, standard deviation.  a Ocular surgeries were not collected in the post-index period.  b Other ocular surgeries included retina surgery.  c Patients could have >1 surgical procedures. | | |
